# Supplementary material for: In vivo volumetric imaging of calcium and glutamate activity at synapses with high spatiotemporal resolution
Source: PubMed Central journal article supplement (PMC8595604; doi:10.1038/s41467-021-26965-7), 2021-11-16
Supplement: 41467_2021_26965_MOESM3_ESM.pdf [file 41467_2021_26965_MOESM3_ESM.pdf]

**Title: Supplementary Movie 1.**

**Description:** Volumetric imaging of visually evoked calcium signaling of GCaMP7s<sup>+</sup> dendrites and dendritic spines in the awake mouse V1 *in vivo* by Bessel focus scanning without and with AO. Imaging volume:  $128 \times 128 \times 60 \mu\text{m}^3$  from  $Z = 340 \mu\text{m}$  to  $Z = 400 \mu\text{m}$  below pia. Visual stimuli: 12 full-field drifting gratings ( $0^\circ$  to  $330^\circ$  at  $30^\circ$  increments) in pseudorandom sequences. Ten trials were repeated for each stimulus and the trial-averaged results were presented in the movie.

**Title: Supplementary Movie 2.**

**Description:** Imaging of visually evoked calcium signaling of GCaMP7s<sup>+</sup> dendrites and dendritic spines in the awake mouse V1 *in vivo* from a single optical section ( $Z = 350 \mu\text{m}$  below pia) by Gaussian focus scanning without and with AO. Visual stimuli: 12 full-field drifting gratings ( $0^\circ$  to  $330^\circ$  at  $30^\circ$  increments) in pseudorandom sequences. Ten trials were repeated for each stimulus and the trial-averaged results were presented in the movie.

**Title: Supplementary Movie 3.**

**Description:** Spontaneous calcium transients of GCaMP6s<sup>+</sup> dendrites and dendritic spines in a volume ( $128 \times 100 \times 60 \mu\text{m}^3$  from  $Z = 190 \mu\text{m}$  to  $Z = 250 \mu\text{m}$  below pia) imaged by Bessel focus scanning without and with AO at 2 Hz volume rate.

**Title: Supplementary Movie 4.**

**Description:** Spontaneous calcium transients of GCaMP6s<sup>+</sup> dendrites and dendritic spines at a single optical section ( $128 \times 100 \mu\text{m}^2$  at  $Z = 220 \mu\text{m}$  below pia) imaged by Gaussian focus scanning without and with AO at 3.3 Hz frame rate.

**Title: Supplementary Movie 5.**

**Description:** Volumetric imaging of visually evoked glutamate signaling (iGluSnFR-A184S) in apical dendritic spines of a visual cortical neuron in an awake mouse *in vivo* by Bessel focus scanning without and with AO ( $128 \times 128 \times 60 \mu\text{m}^3$  from  $Z = 60 \mu\text{m}$  to  $Z = 120 \mu\text{m}$  below pia). Visual stimuli: 12 full-field drifting gratings ( $0^\circ$  to  $330^\circ$  at  $30^\circ$  increments) in pseudorandom sequences. Twenty trials were repeated for each stimulus and the trial-averaged results were presented in the movie.

**Title: Supplementary Movie 6.**

**Description:** Volumetric imaging of visually evoked glutamate signaling (iGluSnFR-A184S) in basal dendritic spines of a visual cortical neuron in an awake mouse *in vivo* by Bessel focus scanning without and with AO ( $128 \times 128 \times 60 \mu\text{m}^3$  from  $Z = 120 \mu\text{m}$  to  $Z = 180 \mu\text{m}$  below pia). Visual stimuli: 12 full-field drifting gratings ( $0^\circ$  to  $330^\circ$  at  $30^\circ$  increments) in pseudorandom sequences. Twenty trials were repeated for each stimulus and the trial-averaged results were presented in the movie.

**Title: Supplementary Software.**

**Description:** MATLAB® codes used to generate the AO-corrected Bessel phase patterns and to calculate PSF for foci experiencing non-circularly-symmetric aberrations are included in Supplementary Software.
